# Supplementary material for: The Prognostic Value of Krebs von den Lungen-6 and Surfactant Protein-A Levels in the Patients with Interstitial Lung Disease
Source: PubMed Central journal article supplement — J Transl Int Med. 2021 Sep 28;9(3):212–22. doi: 10.2478/jtim-2021-0040 (PMC8629416; doi:10.2478/jtim-2021-0040), 2021-09-28
Supplement: jtim-09-212_sm.pdf [file jtim-09-212_sm.pdf]

## Supplementary Material

**Table S1: Patients' clinical characteristics**

| Variables   | ILD                           | Healthy control               | P-value             |
|-------------|-------------------------------|-------------------------------|---------------------|
| Number      | 91                            | 71                            | -                   |
| Age (years) | 55 (45–64) <sup>a</sup>       | 52 (48–55) <sup>a</sup>       | 0.176 <sup>b</sup>  |
| SP-A        | 42.9 (32.5–65.3) <sup>a</sup> | 20.1 (15.1–24.6) <sup>a</sup> | <0.001 <sup>b</sup> |
| KL-6        | 1192 (764–2312) <sup>a</sup>  | 194 (156–289) <sup>a</sup>    | <0.001 <sup>b</sup> |

<sup>a</sup>IQR; <sup>b</sup>P-value was calculated by Mann–Whitney U test.

ILD: interstitial lung disease; IQR: interquartile range; KL-6: Krebs von den Lungen-6; SP-A: surfactant protein-A.

**Table S2: Serum SP-A and KL-6 levels in patients with pathological types of ILDs Pretreatment and Post-treatment. Others: patients with HP or with unclassified ILD**

| Variables      | CTD-ILD                            | IIP                              | IPAF                               | Others                             | P-value            |
|----------------|------------------------------------|----------------------------------|------------------------------------|------------------------------------|--------------------|
| Number (%)     | 36 (39.56%)                        | 20 (21.98%)                      | 22 (24.18%)                        | 13 (14.29%)                        | -                  |
| <i>SP-A</i>    |                                    |                                  |                                    |                                    |                    |
| Pretreatment   | 46.7 (36.8–68.3) <sup>a</sup>      | 40.2 (31.1–51.7) <sup>a</sup>    | 44.1 (29.6–64.6) <sup>a</sup>      | 46.3 (32.8–102.6) <sup>a</sup>     | 0.298 <sup>b</sup> |
| Post-treatment | 46.7 (31.1–63.9) <sup>a</sup>      | 40.0 (31.1–64.4) <sup>a</sup>    | 34.2 (21.2–56.7) <sup>a</sup>      | 49.5 (39.2–76.4) <sup>a</sup>      | 0.347 <sup>b</sup> |
| <i>KL-6</i>    |                                    |                                  |                                    |                                    |                    |
| Pretreatment   | 1246.5 (847–2333.7) <sup>a</sup>   | 1052.0 (745–1502.2) <sup>a</sup> | 1073.0 (702.2–2046.0) <sup>a</sup> | 1246.0 (665.0–3009.5) <sup>a</sup> | 0.320 <sup>b</sup> |
| Post-treatment | 1321.5 (697.5–2616.7) <sup>a</sup> | 735 (514.7–1437.7) <sup>a</sup>  | 742.0 (459.5–1676.5) <sup>a</sup>  | 1463.0 (661.0–3837.0) <sup>a</sup> | 0.136 <sup>b</sup> |

<sup>a</sup>IQR; <sup>b</sup>P-value was calculated by Kruskal–Wallis test.

CTD-ILD: connective tissue disease associated with ILD; HP: hypersensitivity pneumonitis; IIP: idiopathic interstitial pneumonia; ILD: interstitial lung disease; IPAF: interstitial pneumonia with autoimmune features; IQR: interquartile range; KL-6: Krebs von den Lungen-6; SP-A: surfactant protein-A.

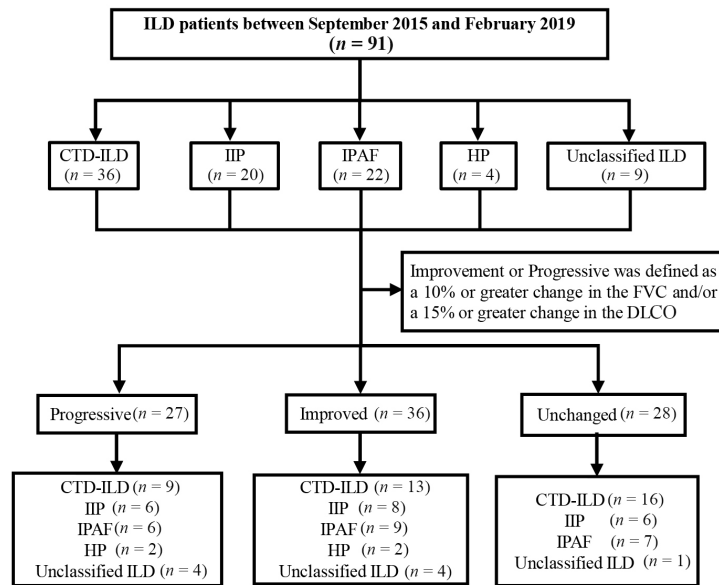

**Figure S1:** Flowchart for the patients with ILD included in the study and their allocation into the three study groups. ILD: interstitial lung disease; DLCO: diffusing capacity for carbon monoxide; FVC: forced vital capacity; HP: hypersensitivity pneumonitis; CTD-ILD: connective tissue disease associated with ILD; IIP: idiopathic interstitial pneumonia; IPAF: interstitial pneumonia with autoimmune features.

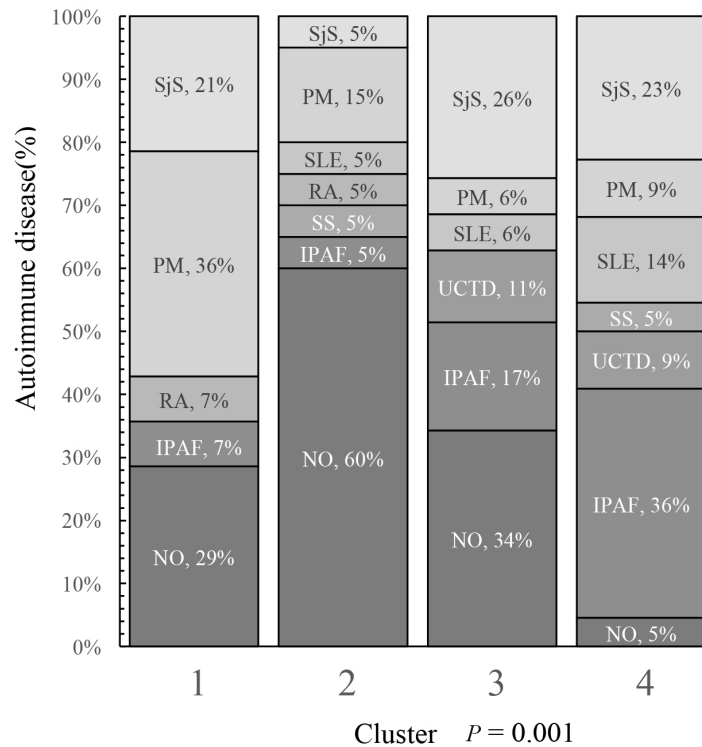

**Figure S2:** Treatment of different kinds of autoimmune diseases in the cluster analysis.  $P$ -values were calculated by Fisher's exact test. SjS: Sjogren's syndrome; PM: polymyositis dermatomyositis; DM: dermatomyositis; RA: rheumatoid arthritis; SS: systemic sclerosis; SLE: systemic lupus erythematosus; UUCTD: undifferentiated connective tissue disease; NO: without autoimmune disease. Comparison of serum KL-6 and SP-A levels between ILD patients and healthy volunteers. We used ROC curve analysis to evaluate the sensitivity and specificity of serum KL-6 and SP-A concentrations as biomarkers for the diagnosis of ILD in Figure S3. Based on the area under the ROC curve (AUC), when the cutoff level for SP-A to distinguish ILD was 29 ng/mL, the sensitivity and specificity were 87.9% and 93%, respectively (AUC = 0.947, 95% CI = 0.914–0.979). When the cutoff level for KL-6 to distinguish IPAF was 470 U/mL, the sensitivity and specificity were 93.4% and 98.6%, respectively (AUC = 0.990, 95% CI = 0.980–1.000).

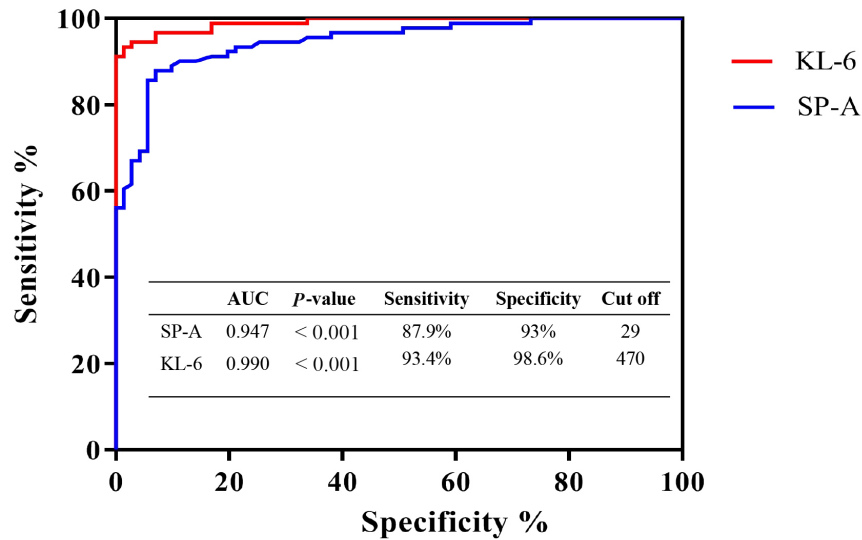

**Figure S3: Receiver-operating characteristic (ROC) curve according to the specificity and sensitivity of serum SP-A and KL-6 levels. SP-A: surfactant protein-A; KL-6: Krebs von den Lungen-6. Of the 83 cases included in the cluster analysis, 61 were treated with steroids alone (prednisolone [PDN]) and methylprednisolone (mPSL) steroids alone. Only eight patients were treated with antifibrotic therapy alone. There was no significant difference ( $P = 0.8401$ ) in the ratio of antifibrotic therapy among the clusters (Figure S4). Therefore, we consider that the relationship between the change of SP-A and KL-6 levels and the treatment response of this study is mainly response to steroids.**

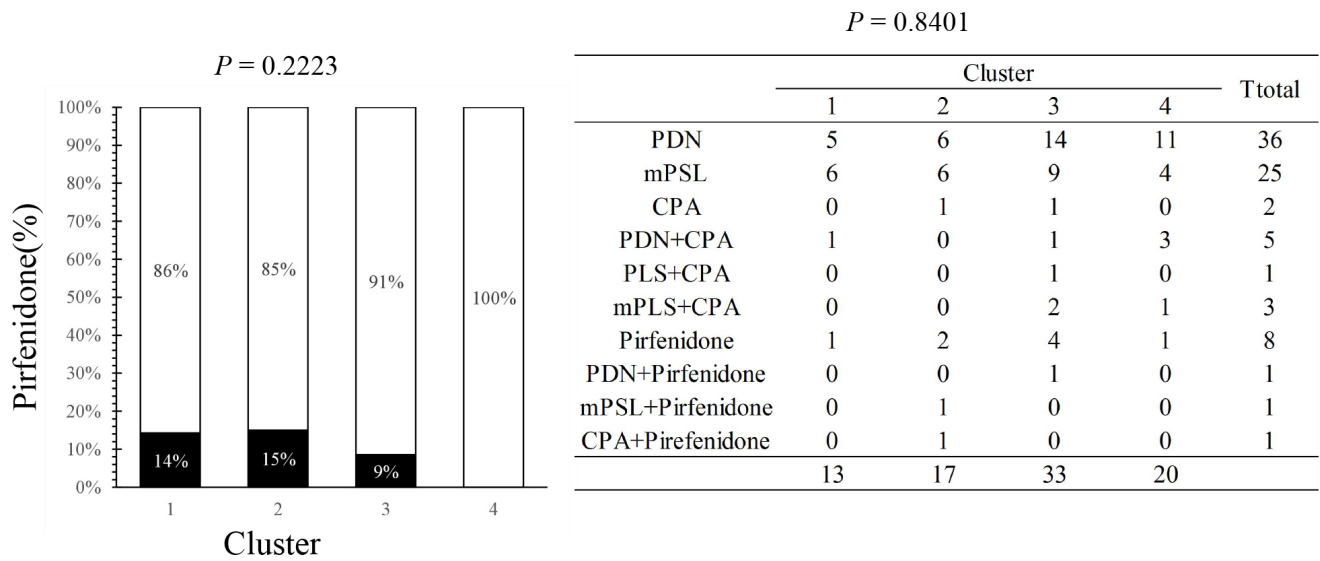

**Figure S4: Treatment of three groups in the cluster analysis. P-values were calculated by Fisher’s exact test. PDN: prednisone; mPSL: methylprednisolone; CPA: cyclophosphamide; PLS: prednisolone.**
